# Supplementary material
Source: Springer Nature journal article supplement (https://www.springermedizin.de/resource/supplementary/13051_2012_264_MOESM1_ESM.pdf/9670280)

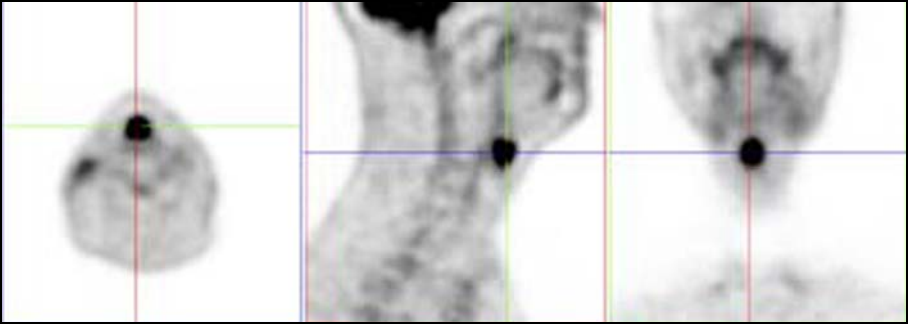

Supplement: MOESM1 [file 9670280]
